# Supplementary material
Source: Springer Nature journal article supplement (https://www.springermedizin.de/resource/supplementary/12882_2003_17_MOESM2_ESM.pdf/9454794)

mmol/L Trolox equivalents

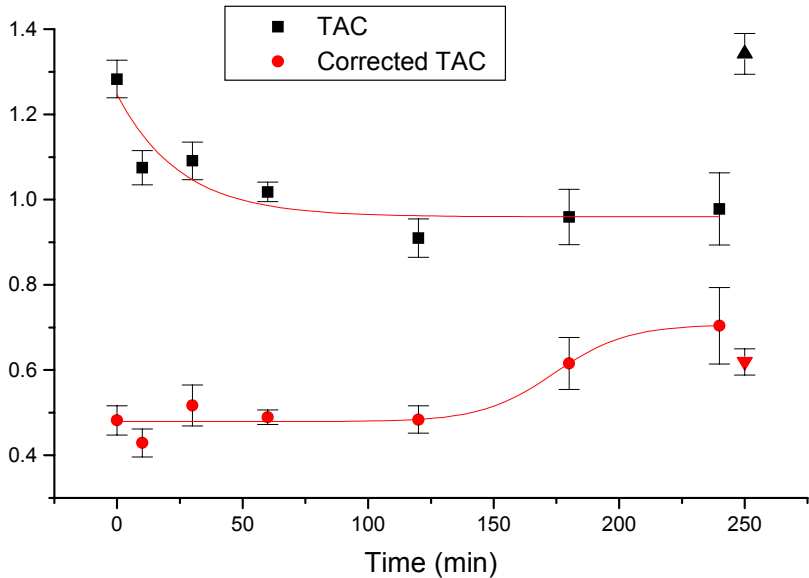

Supplement: MOESM2 [file 9454794]
